# Supplementary material
Source: MDPI journal article supplement (https://www.mdpi.com/2073-4344/12/10/1110)
Supplement: s1 [file s1]

## Supplementary Materials

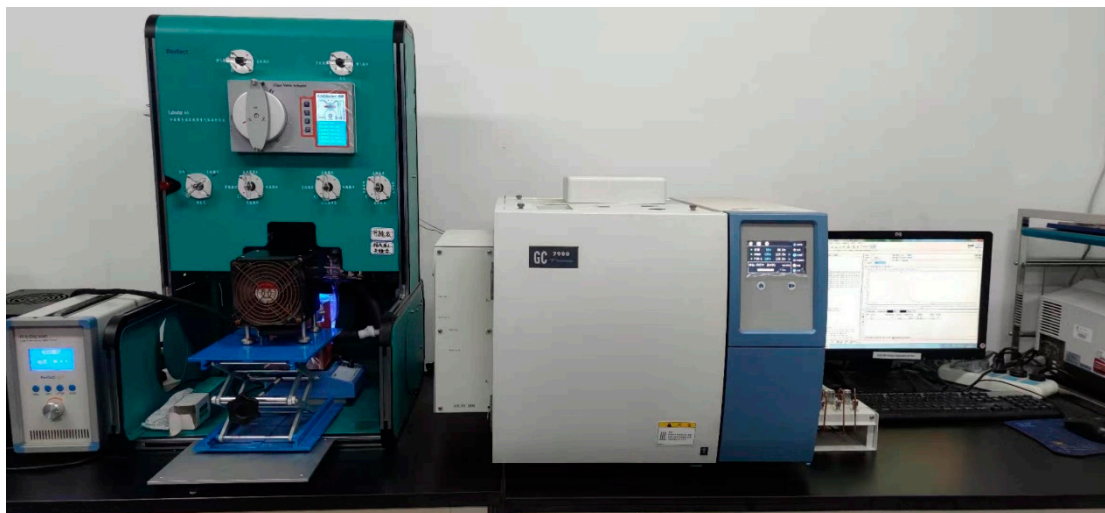

Figure S1. Commercial photocatalytic water splitting system.

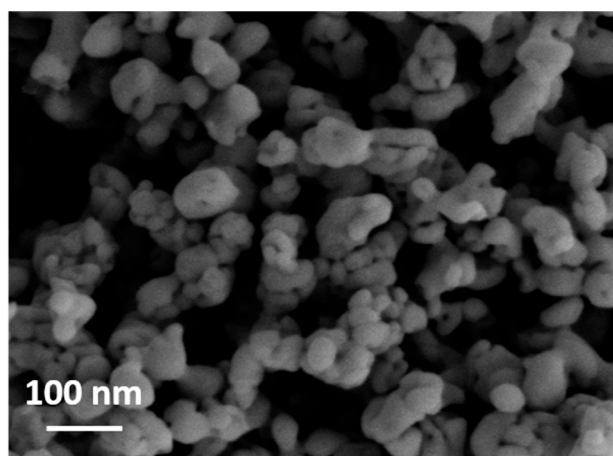

Figure S2. SEM image of (a) the TaON nanoparticles.

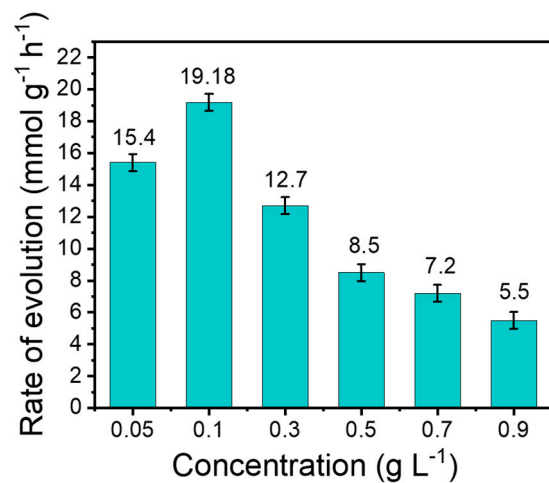

Figure S3. Photocatalytic H<sub>2</sub> evolution rate of the different initial concentrations of the TC4 composites.

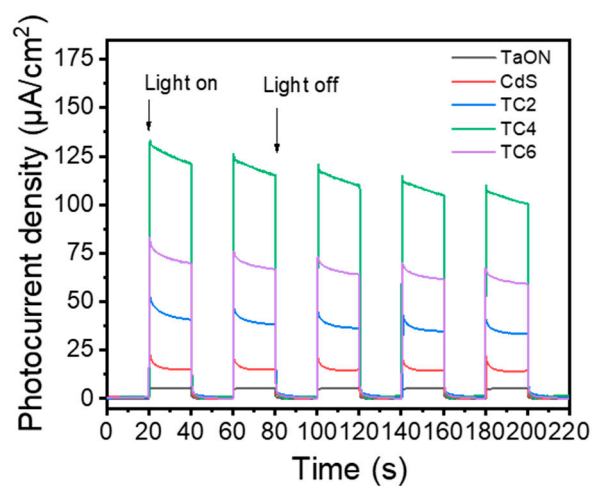

Figure S4. Transient photocurrent responses of pristine TaON, CdS, and the composites samples.

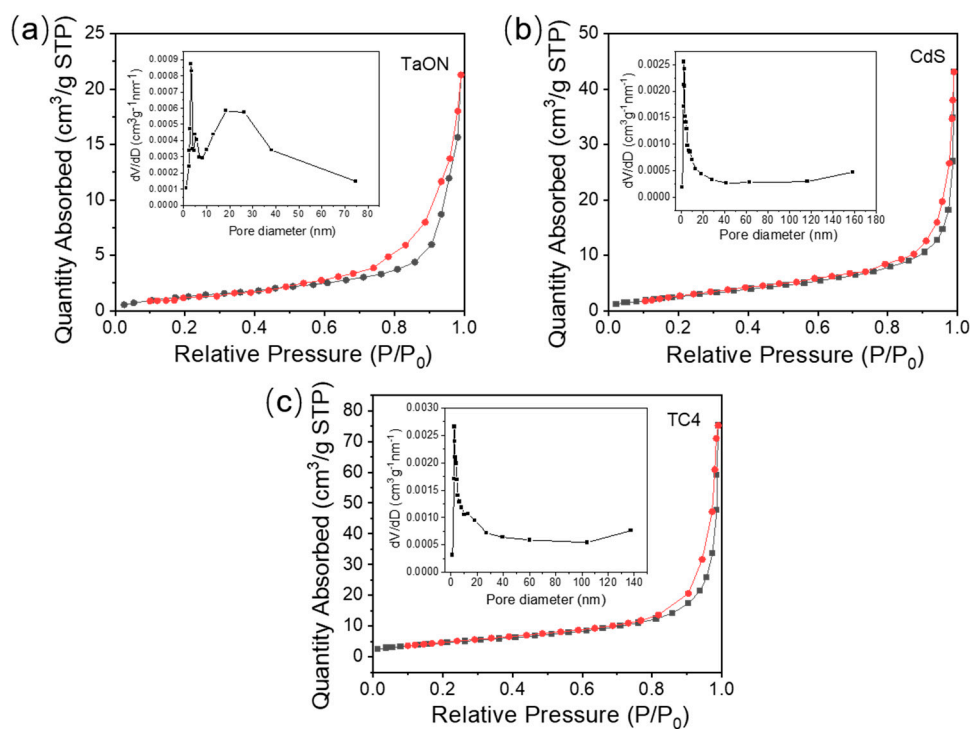

Figure S5. the N<sub>2</sub> sorption isotherm of the (a) the TaON nanospheres; (b) the CdS nanoparticles; (c) the TC4 composites.

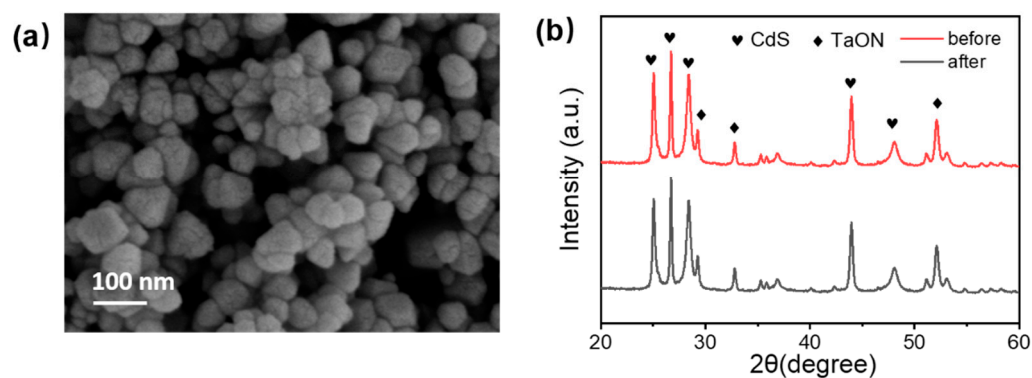

Figure S6. (a) SEM image of TC4 after the cycle stability test; (b) XRD patterns of TC4 before and after the cycle stability test.

Table. S1. The elemental composition of Ta and Cd measured by ICP-AES.

| Samples                | Ta (wt%) | Cd (wt%) | Ta:Cd (molar ratios) |
|------------------------|----------|----------|----------------------|
| 5 wt% TaON/CdS (TC 1)  | 4.24     | 73.3     | 1:30.2               |
| 10 wt% TaON/CdS (TC 2) | 7.72     | 70.5     | 1:15.1               |
| 15 wt% TaON/CdS (TC 3) | 11.1     | 67.7     | 1:10.0               |
| 20 wt% TaON/CdS (TC 4) | 14.2     | 64.2     | 1:7.6                |
| 25 wt% TaON/CdS (TC 5) | 17.0     | 60.8     | 1:6.4                |
| 30 wt% TaON/CdS (TC 6) | 19.6     | 57.4     | 1:5.2                |

Table. S2 The surface areas and pore sizes of the CdS nanoparticles, the TaON nanospheres and the TC4 composites.

| Samples | Surface areas ( $\text{m}^2 \text{g}^{-1}$ ) | Pore size (nm) |
|---------|----------------------------------------------|----------------|
| CdS     | 10.26                                        | 6.5-8.5        |
| TaON    | 5.22                                         | 3.5-5.5        |
| TC4     | 26.82                                        | 5.5-8.5        |
